# Supplementary material for: Anticoagulation strategies in critical care for the treatment of atrial fibrillation: a protocol for a systematic review and meta-analysis
Source: HighWire-hosted journal article supplement (doi:10.1136/bmjopen-2020-037591), 2020-10-01
Supplement: bmjopen-2020-037591supp001_data_supplement.pdf [file bmjopen-2020-037591supp001_data_supplement.pdf]

Supplementary File: Search Strategy used to identify papers included in this review using the Healthcare Databases Advanced Search engine.

| DATABASE | MESH TERMS                                                                                                                                                                                                                                                                                                                                                                                                                                                                                                                                                                                                                                                      | KEYWORDS (TI AND AB)                                                                                                                                                                                                                                                               |
|----------|-----------------------------------------------------------------------------------------------------------------------------------------------------------------------------------------------------------------------------------------------------------------------------------------------------------------------------------------------------------------------------------------------------------------------------------------------------------------------------------------------------------------------------------------------------------------------------------------------------------------------------------------------------------------|------------------------------------------------------------------------------------------------------------------------------------------------------------------------------------------------------------------------------------------------------------------------------------|
| MEDLINE  | ANTICOAGULANTS/ OR "4HYDROXYCOUMARINS"/ OR ABCIXIMAB/ OR ACENOCOUMAROL/ OR ANCROD/ OR ANTITHROMBINS/ OR BECAPLERMIN/ OR "BETA 2-GLYCOPROTEIN I"/ OR "BLOOD COAGULATION FACTOR INHIBITORS"/ OR "CITRIC ACID"/ OR DALTEPARIN/ OR "DERMATAN SULFATE"/ OR DEXTRANS/ OR DICUMAROL/ OR "EDETIC ACID"/ OR ENOXAPARIN/ OR "ETHYL BISCOUMACETATE"/ OR "FIBRIN FIBRINOGEN DEGRADATION PRODUCTS"/ OR GABEXATE/ OR HEPARIN/ OR "HEPARIN, LOWMOLECULAR-WEIGHT"/ OR HEPARINOIDS/ OR NADROPARIN/ OR "PENTOSAN SULFURIC POLYESTER"/ OR PHENINDIONE/ OR PHENPROCOUMON/ OR "PROTEIN C"/ OR "PROTEIN S"/ OR "SODIUM CITRATE"/ OR TINZAPARIN/ OR WARFARIN/ exp "BLOOD COAGULATION"/ | (anticoagul* OR anti-coagul* OR warfarin OR heparin* OR antiplatelet* OR anti-platelet* OR "Direct Oral Anticoagul*" OR "DOAC*" OR "new oral anticoagul*" OR "NOAC*" OR apixaban OR dabigatran OR "dabigatran etexilate" OR rivaroxaban OR "vitamin K antagonist*" OR "VKA").ti,ab |
|          | exp "ATRIAL FIBRILLATION"/                                                                                                                                                                                                                                                                                                                                                                                                                                                                                                                                                                                                                                      | ("atrial fibrillation" OR "AF" OR "atrial flutter*" OR "supraventricular tachy*" OR "SVT").ti,ab                                                                                                                                                                                   |
|          | exp "CRITICAL CARE"/                                                                                                                                                                                                                                                                                                                                                                                                                                                                                                                                                                                                                                            | ("critical care" OR "Intensive care" OR "ITU" OR "critical* ill*" OR "high depend*" OR "intensive therapy").ti,ab                                                                                                                                                                  |
| EMBASE   | exp "ANTICOAGULANT AGENT"/                                                                                                                                                                                                                                                                                                                                                                                                                                                                                                                                                                                                                                      | (anticoagul* OR anti-coagul* OR warfarin OR heparin* OR antiplatelet* OR anti-platelet* OR "Direct Oral Anticoagul*" OR "DOAC*" OR "new oral anticoagul*" OR "NOAC*" OR apixaban OR dabigatran OR "dabigatran etexilate" OR rivaroxaban OR "vitamin K antagonist*" OR "VKA").ti,ab |
|          | exp "ATRIAL FIBRILLATION"/                                                                                                                                                                                                                                                                                                                                                                                                                                                                                                                                                                                                                                      | ("atrial fibrillation" OR "AF" OR "atrial flutter*" OR "supraventricular tachy*" OR "SVT").ti,ab                                                                                                                                                                                   |
|          | "INTENSIVE CARE"/                                                                                                                                                                                                                                                                                                                                                                                                                                                                                                                                                                                                                                               | ("critical care" OR "Intensive care" OR "ITU" OR "critical* ill*" OR "high depend*" OR "intensive therapy").ti,ab                                                                                                                                                                  |
| PUBMED   |                                                                                                                                                                                                                                                                                                                                                                                                                                                                                                                                                                                                                                                                 | (anticoagul* OR anti-coagul* OR warfarin OR heparin* OR antiplatelet* OR anti-platelet* OR "Direct Oral Anticoagul*" OR "DOAC*" OR "new oral anticoagul*" OR "NOAC*" OR apixaban OR dabigatran OR "dabigatran etexilate" OR rivaroxaban OR "vitamin K antagonist*" OR "VKA").ti,ab |
|          |                                                                                                                                                                                                                                                                                                                                                                                                                                                                                                                                                                                                                                                                 | ("atrial fibrillation" OR "AF" OR "atrial flutter*" OR "supraventricular tachy*" OR "SVT").ti,ab                                                                                                                                                                                   |
|          |                                                                                                                                                                                                                                                                                                                                                                                                                                                                                                                                                                                                                                                                 | ("critical care" OR "Intensive care" OR "ITU" OR "critical* ill*" OR "high depend*" OR "intensive therapy").ti,ab                                                                                                                                                                  |

|          |  |                                                                         |
|----------|--|-------------------------------------------------------------------------|
| COCHRANE |  | (anticoag*)                                                             |
|          |  | "atrial fibrillation" OR AF                                             |
|          |  | "Critical care" OR "Intensive care" OR "ITU" OR "high depend*" OR "HDU" |
